# Supplementary material for: Effect of particle size and morphology on the performance of BiFeO3–PDMS piezoelectric generators
Source: Royal Society of Chemistry journal article supplement (doi:10.1039/d0ce00067a), 2020-01-01
Supplement: d0ce00067a1.pdf [file d0ce00067a1.pdf]

# **Supplementary Information for**

## **Effect of Particle Size and Morphology on Performance of BiFeO<sub>3</sub>–PDMS Piezoelectric Generators**

Kohei Yoshiyama, Masae Mori, Manabu Hagiwara,\* and Shinobu Fujihara

Department of Applied Chemistry, Faculty of Science and Technology, Keio University, 3-14-1

Hiyoshi, Kohoku-ku, Yokohama 223-8522, Japan

\*Corresponding author; E-mail address: [hagiwara@aplc.keio.ac.jp](mailto:hagiwara@aplc.keio.ac.jp)

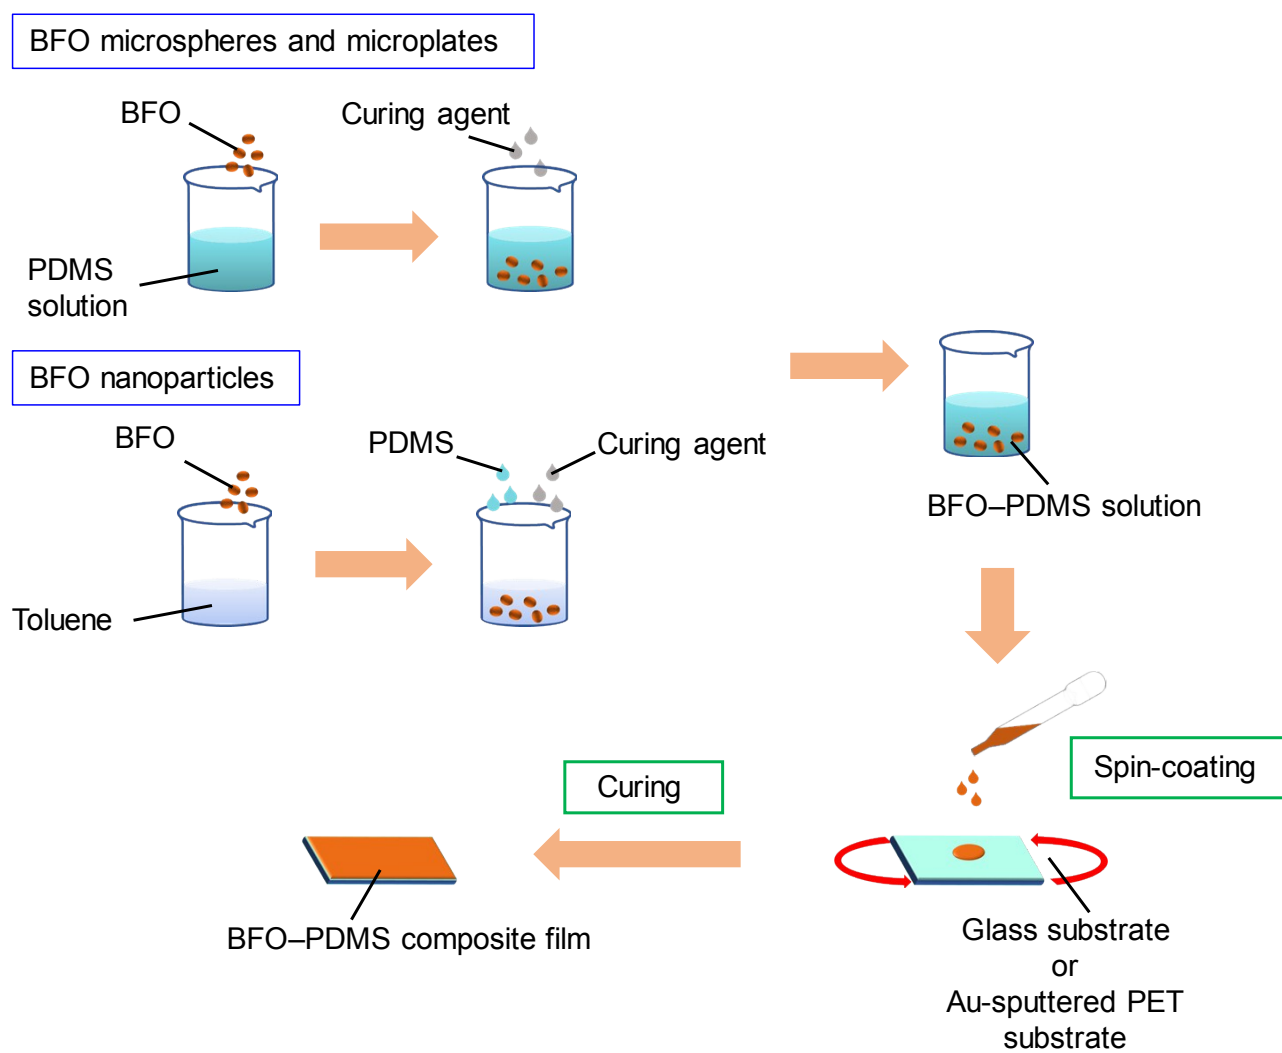

**Fig. S1** Schematic illustration of preparation scheme for BFO-PDMS composite films

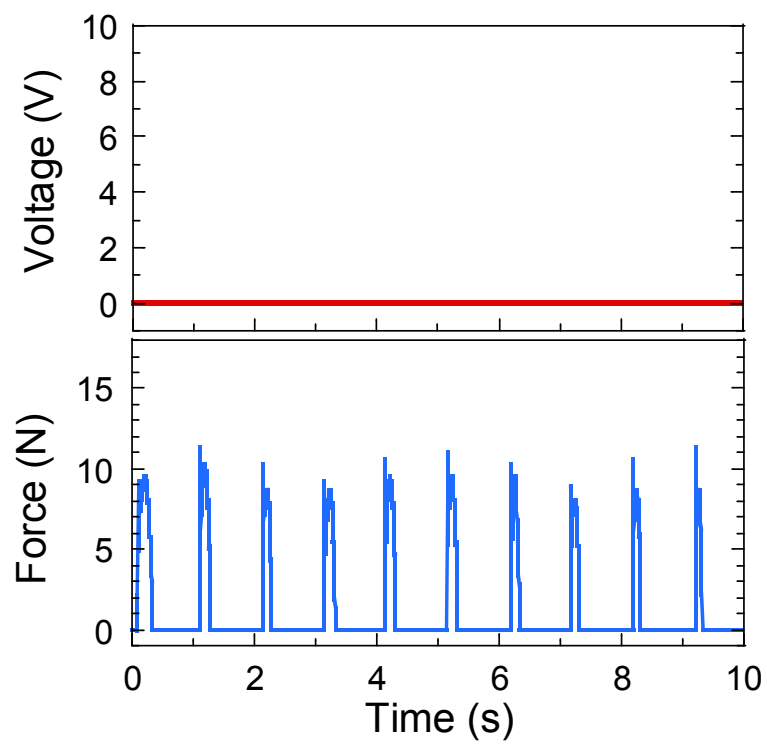

**Fig. S2** Waveforms of open-circuit voltage and corresponding applied compressive force measured on the unpoled BFO–PDMS film fabricated from nanoparticles (Film-NP).
